# Supplementary material for: Electroactive Oxidized Alginate/Gelatin/MXene (Ti3C2Tx) Composite Hydrogel with Improved Biocompatibility and Self-Healing Property
Source: MDPI journal article supplement (doi:10.3390/polym14183908), 2022-09-19
Supplement: s1 [file s1]

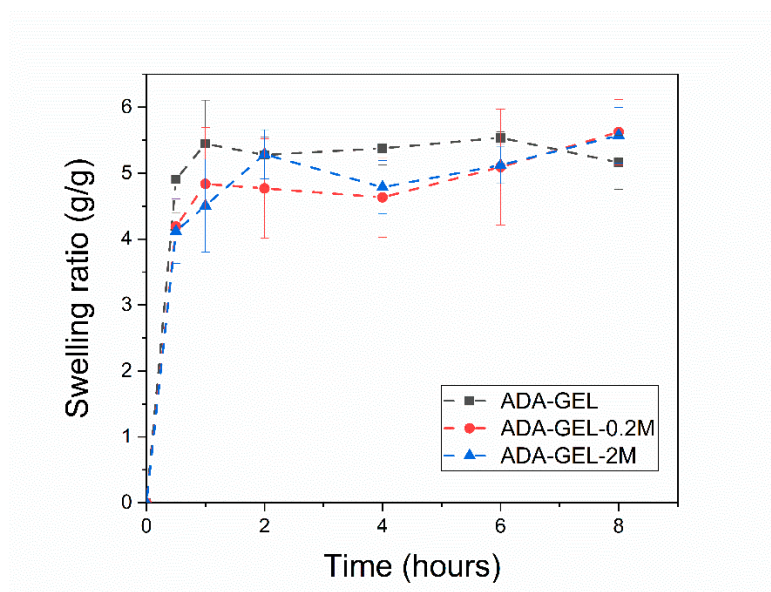

Figure S1. The swelling ratio of different hydrogels immersed in DPBS solution at 37°C for up to 8 hours.

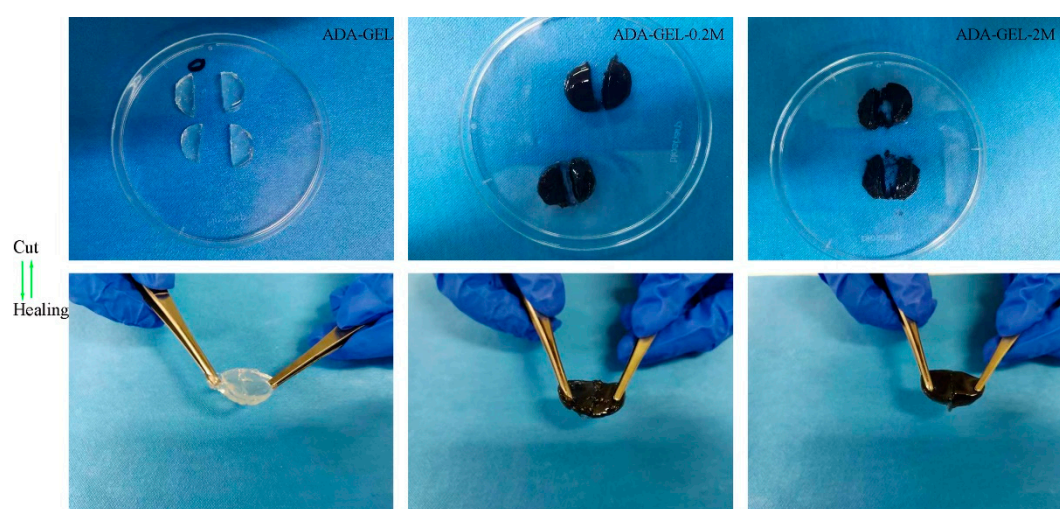

Figure S2. The self-healing behavior of different hydrogels
